# Supplementary material
Source: PubMed Central journal article supplement (PMC1456876)

**A.**

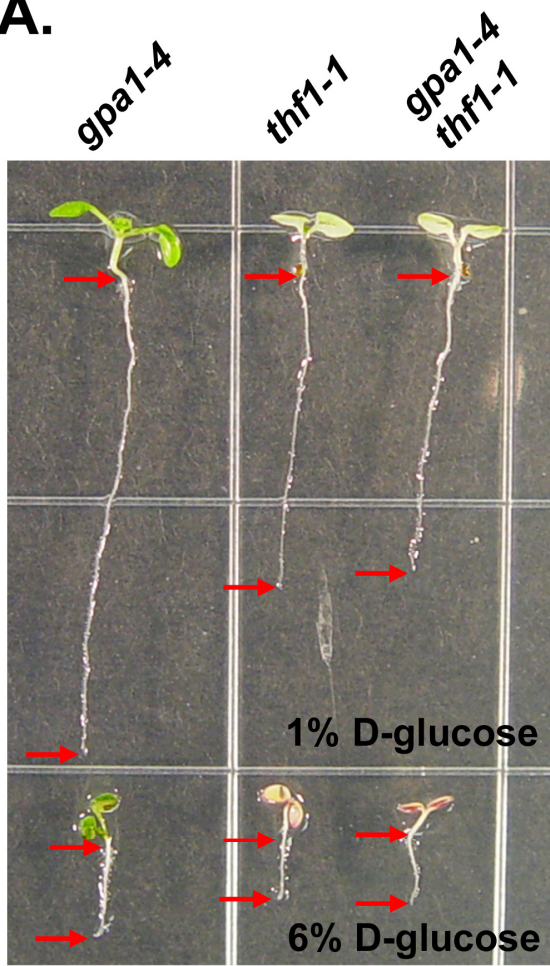

**B.**

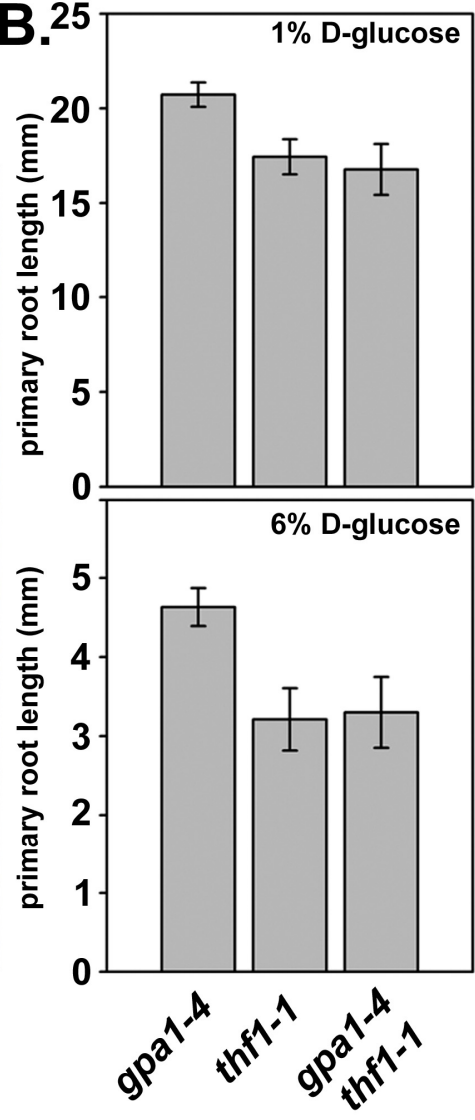

Supplement: plntcell_tpc.105.037259_1.pdf [file plntcell_tpc.105.037259_1.pdf]
